## Corrections

In *PLoS Biology*, volume 1, issue 1:

### What Controls Variation in Human Skin Color?

**Gregory S. Barsh**

**DOI: 10.1371/journal.pbio.0000027**

The source of the image in Figure 2A was incorrectly acknowledged. The correct attribution is as follows:

(A) A traditional skin color map based on the data of Biasutti. Reproduced from <http://anthro.palomar.edu/vary/> with permission from Dennis O'Neil.

The full text XML and HTML versions of the article have been corrected online. This correction note may be found online at DOI: 10.1371/journal.pbio.0000091.

### Candidate Gene Association Study in Type 2 Diabetes Indicates a Role for Genes Involved in $\beta$ -Cell Function as Well as Insulin Action

**Inês Barroso, Jian'an Luan, Rita P. S. Middelberg, Anne-Helen Harding, Paul W. Franks, Rupert W. Jakes, David Clayton, Alan J. Schafer, Stephen O'Rahilly, Nicholas J. Wareham**

**DOI: 10.1371/journal.pbio.0000020**

One of the variants associated with increased diabetes risk was incorrectly indicated throughout this article. The A1369S variant in the gene *ABCC8* should have been written S1369A. The alanine variant is associated with increased risk. This mistake affects Tables 2 and 4, the text of the article in the section entitled "*ABCC8* and *KCNJ11*" on page 45, and the Supporting Information Tables S1 and S2.

The full text XML and HTML versions of the article, and the supporting Tables S1 and S2 have been corrected online. This correction note may be found online at DOI: 10.1371/journal.pbio.0000092.
